# Supplementary material for: Genetics of Resistance to Leaf Rust in Wheat: An Overview in A Genome-Wide Level
Source: Preprints.org preprint supplement (doi:10.20944/preprints202212.0453.v1), 2022-12-23
Supplement: Supplementary file 1 [file Supplementary File S1 Estimated physical positions for all the identified Lr QLr loci.xlsx]

## Sheet: A sub-genome
QTLs	MapChart data	Chromosome Location (bp)
1AS	0	0
QLr.cim-1AS-wPt-9752	0.718955	7189550
QLr.cau-1AS-Xgpw2246	0.769763	7697634
QLr.ramp-1A.2-AX-95080736	5.3898	53897950
Lr10-Xpsr596	5.76348	57634811
QLr.uga-1AL-IWA1952	34.3409	343409113
QLr.fiz-1AL.1-Excalibur_c33567_363	42.782	427819516
QLr.umn-1AL-IWB48030	49.82	498200000
QLr.liu-1AL-SNP532737351chr1A	53.2269	532268787
Lr2K38/QLr.ags-1AL-IWB20487	53.7	537000000
1AL	59.4102	594102056
2AS	0	0
Lr65-Xbarc212	0.158271	1582714
Lr37-Xcmwg682	0.396476	3964757
Lr17a-Xgwm636	0.497721	4977206
Lr81-Xstar-KASP320	6.70302	67030206
LrM-Xgwm512	1.21688	12168771
Lr45-Xcfd168	18.5746	185746106
Lr.locus-2AL-Xgwm1045	46.9118	469117503
QLr.ifa-2AL-Xgwm312	70.9048	709048468
QLr.hebau-2AL-wmc181	72.8609	728609251
QLr.spa-2AL-rPt-9611	77.0799	770798557
2AL	78.0799	780798557
3AS	0	0
Lr63-Xbarc57	1.03121	10312146
QLr.cdl-3AS-Xbarc321	1.16857	11685720
Lr66-Xgwm674	21.4143	214142627
QLr.sfrs-3AL-Xpsr570	58.0289	580289295
QLr.fcu-3AL-Xfcp586	69.0785	690784651
3AL	75.0844	750843639
4AS	0	0
QLr.uga-4AS-IWA1766	0.189299	1892987
QLr.umn-4AS-IWB59410	0.705	7050000
Lr.ace-4AS-IWA232	4.68138	46813793
QLr.hebau-4AL-Xwmc617	59.8713	598712654
QLr.zha-4AL-Tdurum_con-tig93100_149	70.5178	705178347
QLr.liu-4AL-SNP713087672chr4A	71.3017	713016606
Lr28-Xwmc313	73.9515	739514876
4AL	74.4588	744588157
5AS	0	0
QLr.pbi-5AS-wPt1931	0.21005	2100498
QLr.uga-5AS-IWA2143	0.484926	4849258
QLr.leo-5AS-GENE-3321_201	2.81048	28104850
QLr.aus-5AL-IWB23955	45.334	453340000
QLr.crc-5AL-Excalibur_rep_c111129_125	58.4575	584574851
QLr.hebau-5AL-3-AX-110679506	58.9336	589336302
QLr.uga-5AL-IWA5929	65.9333	659332607
5AL	70.9774	709773743
6AS	0	0
Lr62-Xgwm334	0.924925	9249250
Lr56-Xgwm427	59.6183	596183400
Lr64-K-IWB59855	60	600000000
QLr.ramp-6A.1-AX-95147877	61.5469	615468938
6AL	61.8079	618079260
7AS	0	0
Lr47-Xgwm60	5.4962	54961951
QLr.tur-7AS-IWA1277	6.85	68500000
QLr.uga-7AS-IWA7201	7.64994	76499417
QLr.liu-7AS-SNP126914404chr7A	12.691	126910006
Lr20-Xpsr148	72.4113	724113125
7AL	73.6706	736706236

## Sheet: B sub-genome
QTLs	MapChart data	Chromosome Location (bp)
1BS	0	0
Lr55-Xwmc406	3.858	38575713
Lr33/44-Xgwm413	7.314	73135035
Lr71-Xgwm18	22.258	222577453
Lr75/QLr.sfr-1BS-Xgwm18	22.258	222577453
QLr.pser-1BL-Xwmc85.1	32.894	328936542
LrZH84-Xgwm582	34.477	344771685
QLr.leo-1BL-tplb0023b14_704	44.518	445180534
QLr.wpt-1BL-wPt-9809	64.269	642695338
Lr46/QLr.caas-1BL/QLr.csiro-1BL/QLr.cim-1BL-Xgwm259	67.233	672333316
Lr51-Xcdo393	68.169	681686510
1BL	68.985	689851870
2BS	0	0
QLr.usw-2BS-Tdurum_contig76118_145	0.465	4646815
Lr16-Xwmc764	0.807	8072706
QLr.spa-2B-wPt-7883	2.699	26987142
QLr.csiro-2BS-Xwmc154	3.645	36446324
Lr48-Xgwm429b	7.362	73617905
QLr.hebau-2BS-wPt-2314	10.408	104080243
Lr23/QLr.ksu-2BS-Xcdo405	13.981	139814182
Lr13-TraesCS2B02G182800	15.769	157686977
LrKP-F299R300	16.861	168610742
Lr35-Xbcd260	41.962	419615396
QLr.osu-2B-Xbarc167	44.871	448713888
QLr.ifa-2BS-Xgwm120	61.579	615792350
Lr.locus-2B5-wmc332	73.939	739396055
QLr.dms-2B.2-Excalibur_c62234_105	76.271	762709735
LrNJ97-Xwmc317	78.389	783892146
2BL	80.126	801256715
3BS	0	0
QLr.ifa-3BS-Xgwm389	0.081	806362
Lr74/QLr.hwwg-3BS.1-barc75	0.339	3395373
QLr.cim-3BS.1-wPt-6945	6.982	69815608
LrSV2-Xpsr598	7.271	72707449
QLr.fcu-3BL-Xbarc164	58.652	586521810
QLr.wpt-3BL-wPt-7502	63	630003236
QLr.hebau-3BL-AX-111534420	76.132	761315371
3BL	83.083	830829764
4BS	0
QLr.sfrs-4B-Xpsr921	37.615	376154284
Lr12/Lr31/QLr.hebau-4B-gwm149	54.465	544649712
Lr25-Xgwm251	56.855	568556123
Lr49-Xbarc163	60.825	608252300
QLr.spa-4B-wPt-5303	65.351	653509128
4BL	67.362	673617499
5BS	0	0
Lr52-Xgwm234	0.819	8188725
QLr.cim-5BL-AX-94962653f	6.138	61384177
QLr.fiz-5B-wsnp_Ex_c6548_11355524	43.973	439725113
Lr18-Xwmc75	57.3089	573086053
5BL	71.315	713149757
6BS	0	0
QLr.usw-6BS-CAP7_c10772_156	0.338	3384271
QLr.wpt-6BS.1-wPt-3116	1.038	10377716
Lr53-Xwmc487	3.635	36353756
QLr.caas-6BS.1-Xwmc487	3.635	36353756
Lr61-Xwmc487	3.635	36353756
Lr59-Xgwm518	8.899	88998675
Lr36-Xgwm88	43.008	430082136
QLr.liu-6B-SNP459220281chr6B	45.922	459220250
QLr.cimmyt-6BL.1-Xgwm219	67.484	674843297
Lr3-wpt-6878	71.217	712165280
QLr.usw-6BL-wsnp_Ex_c45713_51429315	71.235	712346816
QLr.cim-6BL-AX-95155193	71.578	715779853
6BL	72.099	720988478
7BS	0	0
Lr72-barc279	0.932	9315515
QLr.sfrs-7B.2-Xpsr129c	63.889	638885116
QLr.cimmyt-7BL.1-wPt-4342	69.334	693341775
QLr.osu-7BL/QLrlp.osu-7BL-Xbarc50	72.906	729067280
QLr.cim-7BL-Xwmc526	73.482	734818131
Lr14a-Xgwm146	74.072	740720390
Lr68-Xgwm146	74.072	740720390
QLr.ubo-7B.2-Xgwm146	74.072	740720390
LrFun-Xwmc70	74.492	744918196
7BL	75.062	750620385

## Sheet: D sub-genome
QTLs	MapChart data	Chromosome Location (bp)
1DS	0	0
Lr21/40-Xbcd1434	0.0577268	577268
Lr60-barc149	0.415141	4151406
LrTs276-2-Xcfd15	0.905456	9054565
Lr42-Xcfd15	0.905456	9054565
1DL	49.5453	495453186
2DS	0	0
Lr11-wmc574	0.505	5054022
QLrlp.osu-2DS-Xbarc124	0.522786	5227859
Lr80-gwm210	0.663702	6637023
Lr39/41-gwm210	0.663702	6637023
QLr.cim-2DS-cfd51	1.23607	12360665
Lr2a/QLr.mna-2DS-barc95	1.403	14032404
QLr.inra-2D-cfd36	1.43628	14362782
Lr22a-gwm296	1.76092	17609164
QLrid.osu-2DS-Xgwm261	1.9623	19622982
Lr15-Xgwm102	7.26606	72660599
Lr54-Xcfd50	63.7444	637443897
2DL	65.185	651852609
3DS	0	0
Lr32-barc135	2.53496	25349607
QLr.hebau-3DS-AX-109395143	5.32329	53232885
QLr.cim-3DC-gwm341	10.9554	109554355
Lr24-Xpsr931	59.4152	594152434
3DL	61.5552	615552423
4DS	0	0
Lr67/QLr.sun-4DL-cfd71	32.4469	324469001
4DL	50.9857	509857067
5DS	0	0
Lr70-wmc233	0.582482	5824822
Lr76-Xgwm190	0.874687	8746873
Lr78-cfd189	3.90424	39042401
Lr57-Xpsr128	34.6637	346637421
Lr1-Xgwm272	56.2338	562337785
5DL	56.608	566080677
6DS	0	0
QLr.cdl-6D-wPt-664670	23.7736	237736039
QLr.cau-6DL-cfd188	23.8118	238118148
Lr38-Xbarc273	37.6953	376952672
6DL	47.359	473592718
7DS	0	0
QLr.jki-7D.1-AX-94930280	1.61197	16119691
Lr34-Xgwm295	5.36409	53640904
Lr19-Xgdm67	56.331	563309984
7DL	63.869	638686055
